# Supplementary material
Source: publisher site journal article supplement (https://www.dovepress.com/article/258625)
Supplement: Supplementary file 1 [file get_supplementary_file.php]

Supporting information

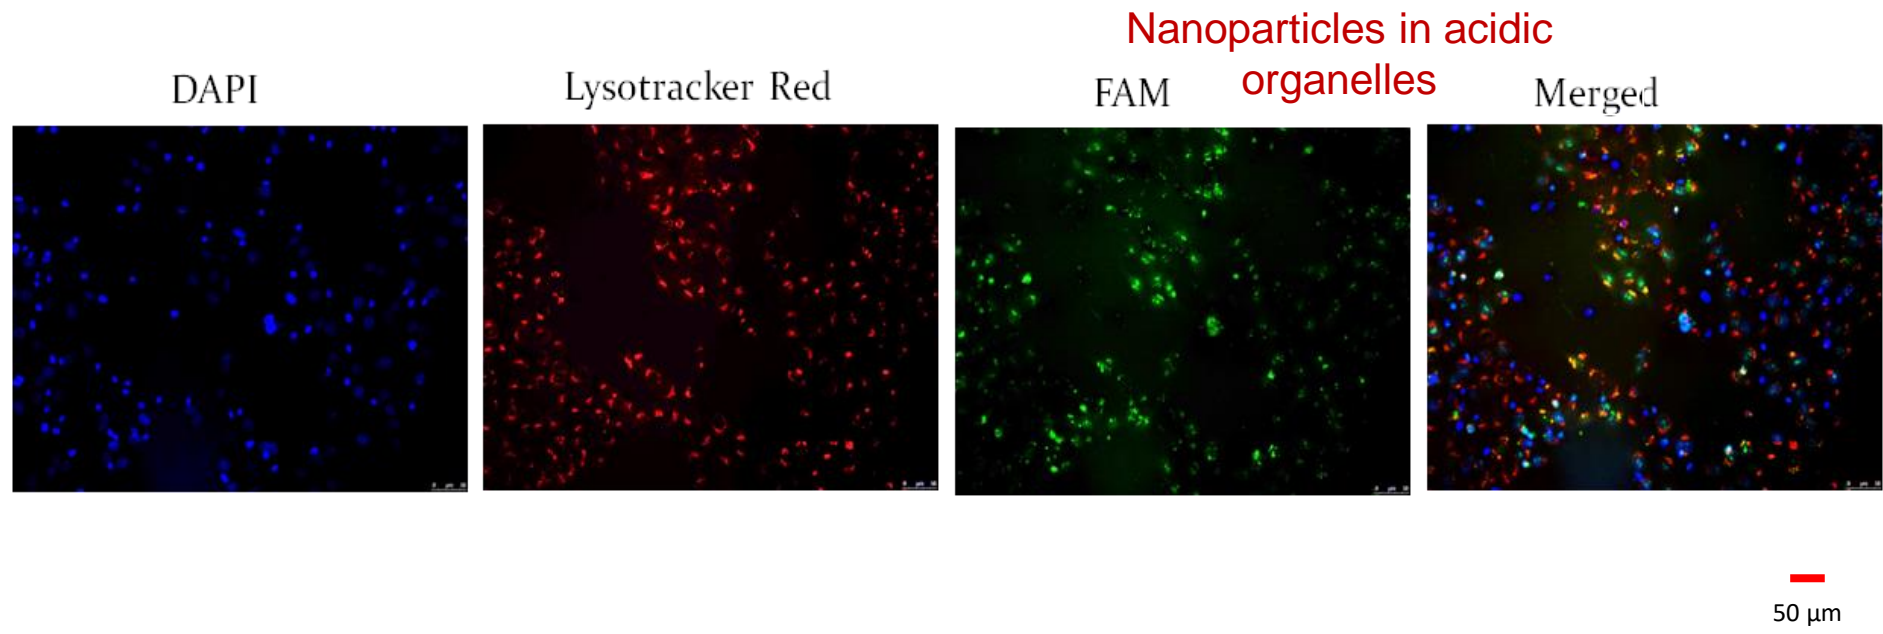

Figure S1: Intracellular trafficking of GNS in the cells

# Necrotic and Apoptotic Cell Analysis

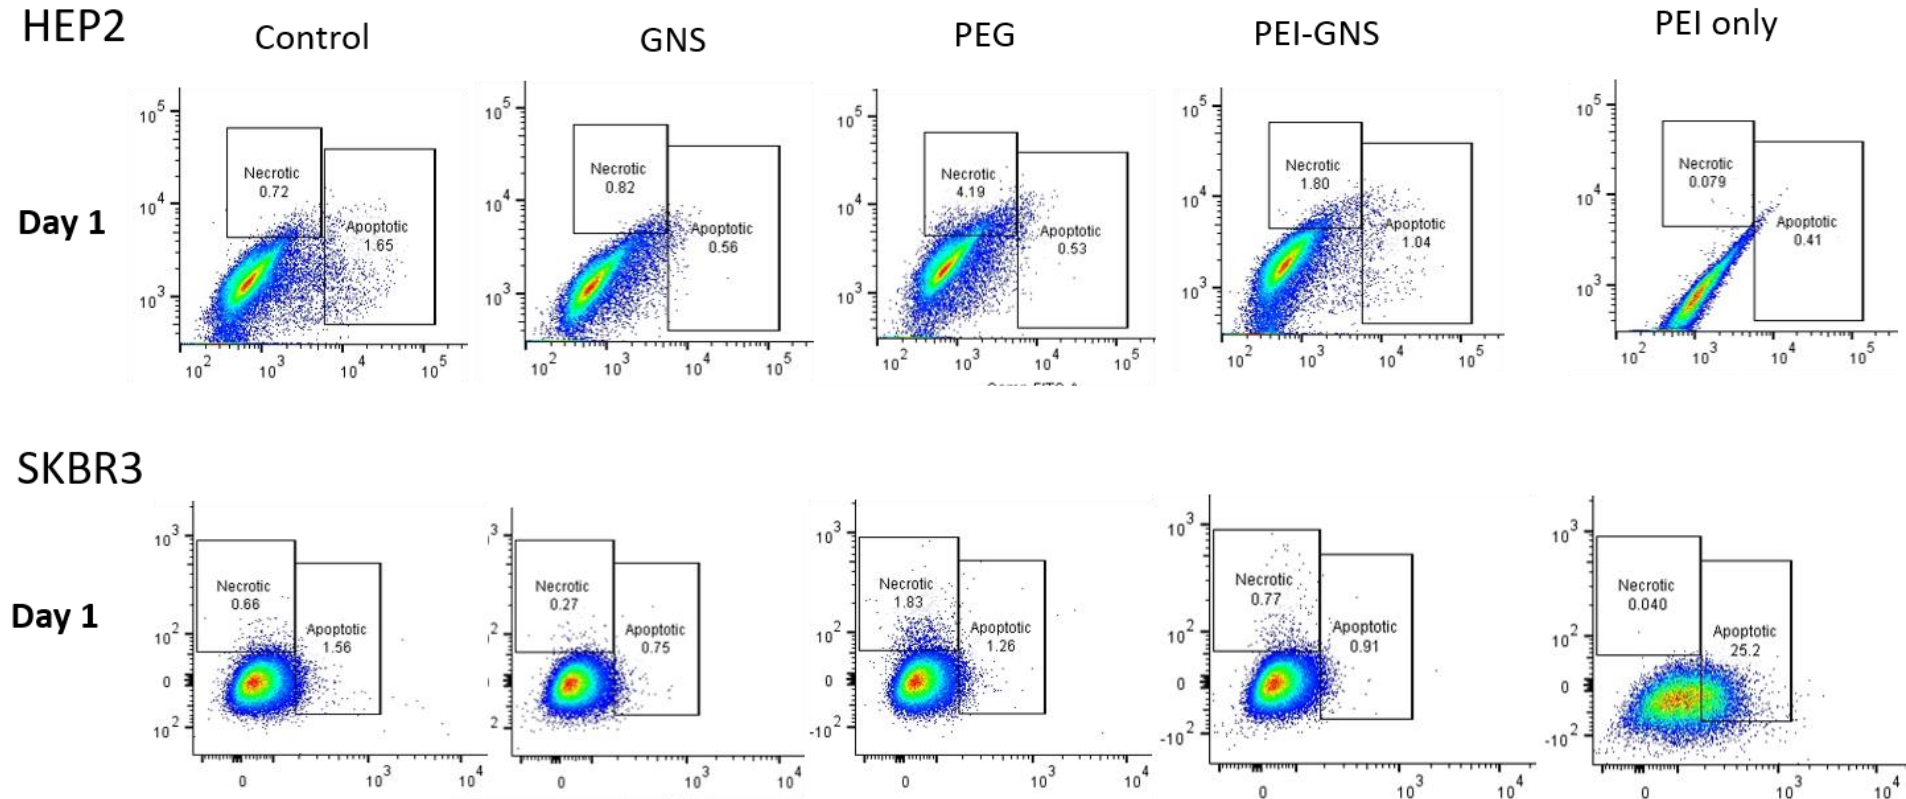

Figure S2:Necrotic and apoptotic cell analysis for 24 hours .

# Necrotic and Apoptotic Cell Analysis

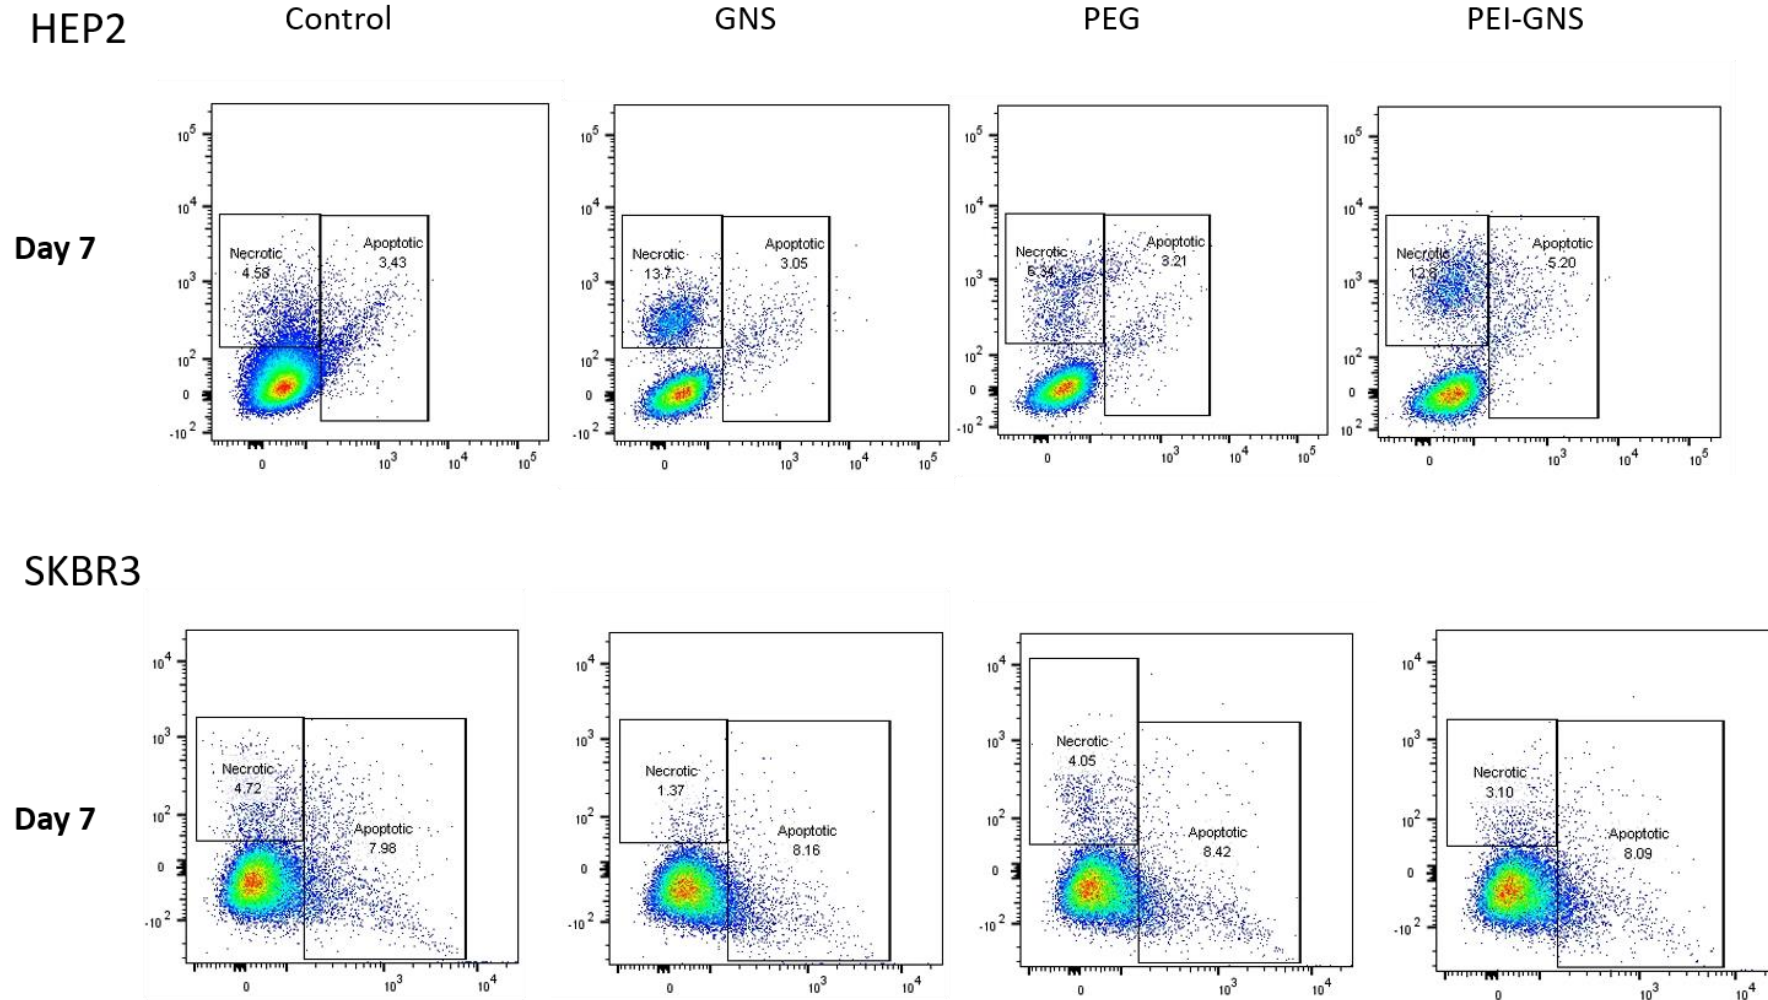

Figure S3: Necrotic and apoptotic cell analysis on day 7 .

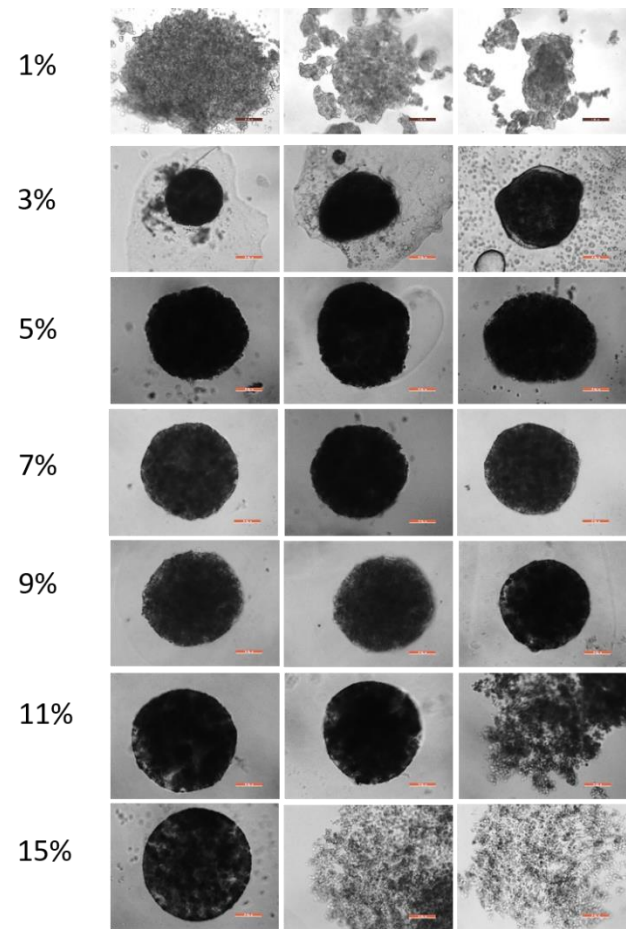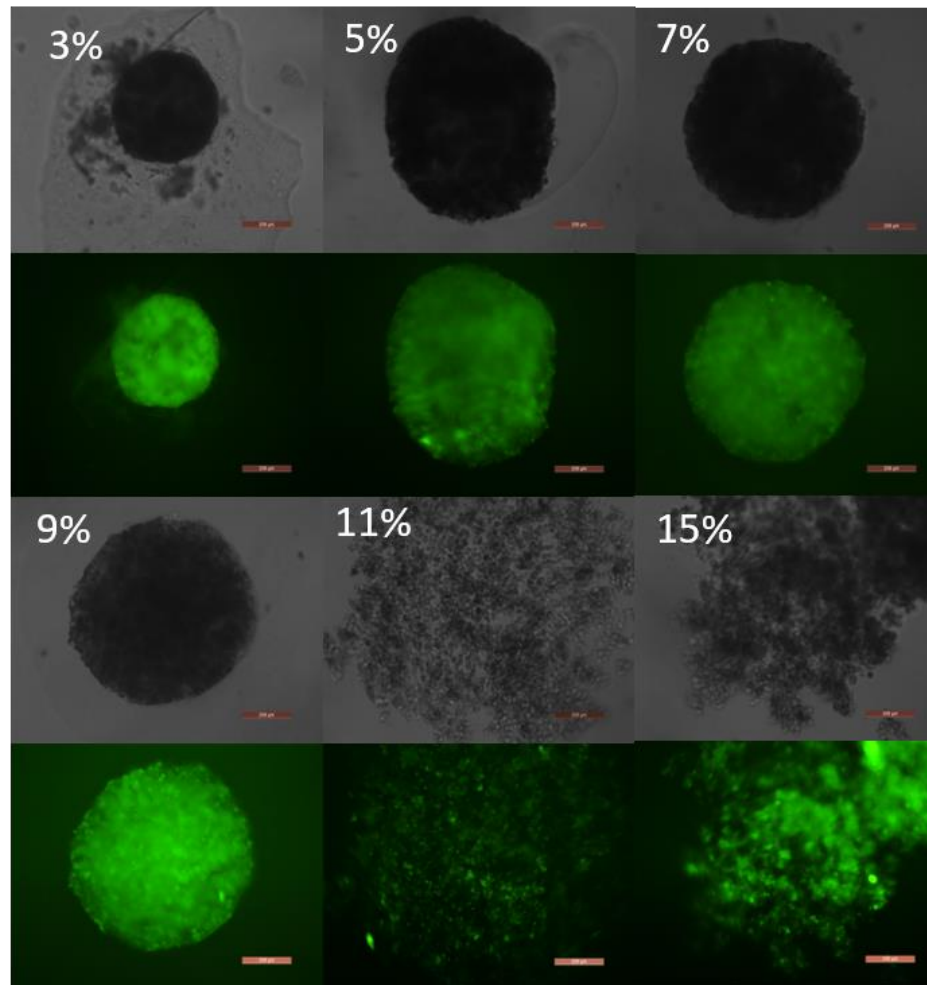

Figure S4: (A) 3D spheroids cultured with different percentage of dextran (B) Florescence images of live cell of 3D spheroids staining using calcein .
